# Supplementary material for: Evaluating Phenotypic and Transcriptomic Responses Induced by Low-Level VOCs in Zebrafish: Benzene as an Example
Source: MDPI journal article supplement (doi:10.3390/toxics10070351), 2022-06-27
Supplement: s1 [file s1]

Table S2: Top IPA pathways affected by 1 or 0.1 ppm benzene exposure

| Benzene exposure levels                        | 1 ppm | 0.1 ppm |
|------------------------------------------------|-------|---------|
| <b>Disease and disorders</b>                   |       |         |
| Cancer                                         | 134   | 32      |
| Organismal Injury and Abnormalities            | 136   | 32      |
| Gastrointestinal Disease                       | 122   | 30      |
| Endocrine System Disorders                     | 121   |         |
| Reproductive System Disorders                  | 111   |         |
| Inflammatory Response                          |       | 8       |
| Renal and Urological Disease                   |       | 6       |
| <b>Molecular and cellular function</b>         |       |         |
| Cellular Movement                              | 38    | 13      |
| Small Molecule Biochemistry                    | 43    | 8       |
| Cell Morphology                                | 15    |         |
| Cellular Assembly and Organization             | 8     |         |
| Lipid Metabolism                               | 36    |         |
| Cell Cycle                                     |       | 10      |
| Cell-to-Cell Signaling and Interaction         |       | 10      |
| Cellular Growth and Proliferation              |       | 10      |
| <b>Physiological system development</b>        |       |         |
| Hematological System Development and Function  | 18    |         |
| Immune Cell Trafficking                        | 17    |         |
| Tissue Morphology                              | 25    |         |
| Organismal Survival                            | 43    |         |
| Connective Tissue Development and Function     | 11    |         |
| Reproductive System Development and Function   |       | 6       |
| Nervous System Development and Function        |       | 10      |
| Cardiovascular System Development and Function |       | 7       |
| Embryonic Development                          |       | 10      |
| Organismal Development                         |       | 12      |

Table S3: Estimated Z-score of biological process following 1 ppm benzene exposure

| <b>Biological process</b>                      | <b>Z-score</b> |
|------------------------------------------------|----------------|
| <b>Nervous System Development and Function</b> |                |
| Cognition                                      | -2.4           |
| Learning                                       | -2.2           |
| Memory                                         | -2.0           |
| <b>Gastrointestinal Disease</b>                |                |
| Hepatic steatosis                              | -2.0           |
| <b>Organismal Development</b>                  |                |
| Size of body                                   | 2.0            |
| <b>Infectious Diseases</b>                     |                |
| Infection by RNA virus                         | 2.5            |
| <b>Canonical Pathways</b>                      |                |
| Phagosome Formation                            | 1.4            |
| Insulin Secretion Signaling Pathway            | 1.3            |
| LXR/RXR Activation                             | 1.0            |
