# Supplementary material for: Evaluating Phenotypic and Transcriptomic Responses Induced by Low-Level VOCs in Zebrafish: Benzene as an Example
Source: Toxics. 2022 Jun 27;10(7):351. doi: 10.3390/toxics10070351 (PMC9324908; doi:10.3390/toxics10070351)
Supplement: Supplementary file 1 [file toxics-10-00351-s001.zip › toxics-1749112-Table S1.xlsx]

## Sheet: 1 ppm
ENSEMBL ID	Conc. (ppm)	Gene symbol	Fold change	p value
ENSDARG00000060539	1	SHANK1	0.435015	0.000288503
ENSDARG00000101093	1	zgc:162971	0.436413	0.000247948
ENSDARG00000103123	1	LOC101885998	0.443373	0.000764451
ENSDARG00000073963	1	si:ch211-258f14.2	0.4646	0.000524389
ENSDARG00000074903	1	itcha	0.480722	0.00188413
ENSDARG00000018913	1	hmbox1b	0.483119	0.00131808
ENSDARG00000063011	1	antxr2b	0.48775	0.00375617
ENSDARG00000098661	1	LOC101885450	0.488785	0.00179615
ENSDARG00000052361	1	IL15	0.493769	0.00233613
ENSDARG00000046133	1	B3GALNT2	0.494864	0.00271117
ENSDARG00000104989	1	WNK2	0.499279	0.00424024
ENSDARG00000068192	1	taf4a	0.50241	0.0056984
ENSDARG00000018296	1	REV1	0.507043	0.00103373
ENSDARG00000040640	1	LOC101883645	0.507197	0.00591335
ENSDARG00000079766	1	TAP1	0.513052	0.00661212
ENSDARG00000031618	1	unm_sa1261	0.517863	0.00893508
ENSDARG00000101867	1	si:ch1073-416d2.4	0.518477	0.00311694
ENSDARG00000016837	1	glipr2l	0.523861	0.00220262
ENSDARG00000062976	1	iffo1a	0.527181	0.0100556
ENSDARG00000004874	1	SPATA6L	0.528661	0.00597844
ENSDARG00000025783	1	si:ch211-125e6.11	0.531358	0.00284696
ENSDARG00000074314	1	TTC37	0.533106	0.00231093
ENSDARG00000086189	1	MGP	0.534941	0.0117537
ENSDARG00000040920	1	si:dkey-49n23.1	0.536502	0.0129145
ENSDARG00000018553	1	IFIH1	0.538317	0.0136673
ENSDARG00000093708	1	arhgap20b	0.540278	0.0139875
ENSDARG00000067545	1	adam19b	0.542912	0.0124677
ENSDARG00000104118	1	antxr2a	0.543421	0.00173725
ENSDARG00000101933	1	celf6	0.54521	0.00767491
ENSDARG00000043388	1	ATRAID	0.545978	0.0106641
ENSDARG00000018773	1	hivep2b	0.547327	0.0162075
ENSDARG00000078645	1	LOC101884909	0.547358	0.0163661
ENSDARG00000001559	1	CSMD2	0.5487	0.00123188
ENSDARG00000007277	1	MYF5	0.549434	0.00685482
ENSDARG00000056121	1	SERAC1	0.549675	0.0166344
ENSDARG00000060010	1	IQGAP2	0.551673	0.0115521
ENSDARG00000101667	1	si:ch73-233f7.6	0.553857	0.018749
ENSDARG00000001437	1	slc2a1a	0.554574	0.00475949
ENSDARG00000052553	1	LIG3	0.555595	0.00760119
ENSDARG00000102075	1	rnf122	0.558781	0.0152276
ENSDARG00000067781	1	urp2	0.55938	0.0111231
ENSDARG00000078212	1	zgc:165515	0.559513	0.0189157
ENSDARG00000005786	1	PPM1F	0.559909	0.021138
ENSDARG00000099931	1	pcdh1g26	0.560885	0.015519
ENSDARG00000078560	1	SLC9A5	0.560965	0.0144217
ENSDARG00000004151	1	RAB23	0.5612	0.0217117
ENSDARG00000035895	1	fndc5b	0.561703	0.0165674
ENSDARG00000069139	1	grik1a	0.562762	0.010365
ENSDARG00000099482	1	LOC101883107	0.563099	0.0137682
ENSDARG00000031587	1	FLVCR1	0.564991	0.0108556
ENSDARG00000018967	1	gabbr1a	0.565863	0.0106323
ENSDARG00000012369	1	rdh10b	0.567463	0.0114168
ENSDARG00000021677	1	PHF11	0.568528	0.0245508
ENSDARG00000077047	1	ptprnb	0.571502	0.0206241
ENSDARG00000104495	1	PLTP	0.573194	0.00403292
ENSDARG00000013777	1	PPP1R13L	0.573206	0.0124735
ENSDARG00000101883	1	LOC100331458	0.574457	0.0213407
ENSDARG00000054755	1	ALOX5AP	0.575177	0.0200331
ENSDARG00000054363	1	wu:fd14a06	0.575321	0.0232817
ENSDARG00000040380	1	arhgef1a	0.575702	0.00723437
ENSDARG00000004445	1	grm5a	0.576684	0.00603779
ENSDARG00000094132	1	IGF1	0.576848	0.024873
ENSDARG00000062016	1	VPS51	0.579035	0.0159832
ENSDARG00000012833	1	FOXN3	0.579533	0.0153672
ENSDARG00000023759	1	zgc:73226	0.581286	0.0300513
ENSDARG00000076127	1	GABRB1	0.582102	0.0173062
ENSDARG00000035533	1	tacr1a	0.582172	0.0247758
ENSDARG00000062553	1	bach1a	0.582619	0.00957112
ENSDARG00000062621	1	LOC571757	0.583216	0.0245696
ENSDARG00000007244	1	ACP2	0.583654	0.0156472
ENSDARG00000079977	1	nhsb	0.583922	0.0107451
ENSDARG00000077607	1	dus2	0.584333	0.00731989
ENSDARG00000093193	1	chia.5	0.585765	0.0237686
ENSDARG00000077481	1	si:dkey-76k16.6	0.58599	0.0282455
ENSDARG00000087517	1	btbd3b	0.58818	0.0313108
ENSDARG00000043396	1	fndc4a	0.588363	0.034802
ENSDARG00000063255	1	btbd11a	0.588452	0.0340397
ENSDARG00000026871	1	UCHL1	0.589687	0.0272571
ENSDARG00000078997	1	DCLK3	0.590466	0.0197141
ENSDARG00000017790	1	chrnb2b	0.591015	0.0136902
ENSDARG00000058394	1	tagln3b	0.591309	0.00839667
ENSDARG00000077656	1	ARFGEF3	0.591655	0.0183062
ENSDARG00000062489	1	MARCH8	0.59202	0.0202562
ENSDARG00000060522	1	RFK	0.592161	0.0277822
ENSDARG00000058284	1	epha5	0.593788	0.0370373
ENSDARG00000045465	1	LANCL2	0.593976	0.00748634
ENSDARG00000004577	1	tmem178ba	1.68216	0.0301425
ENSDARG00000077169	1	si:ch211-153b23.4	1.6831	0.020672
ENSDARG00000011072	1	DDX11	1.68467	0.0217564
ENSDARG00000055046	1	ponzr5	1.68542	0.0331402
ENSDARG00000046098	1	EBP	1.68638	0.022606
ENSDARG00000027966	1	ap1s3b	1.6869	0.0377215
ENSDARG00000103754	1	ASPM	1.68715	0.0375179
ENSDARG00000100693	1	ddr2a	1.69027	0.015047
ENSDARG00000023495	1	IFT74	1.69042	0.0327048
ENSDARG00000016656	1	MGME1	1.69103	0.0368795
ENSDARG00000091298	1	pmela	1.69208	0.0170659
ENSDARG00000088891	1	SLC23A3	1.69368	0.0350876
ENSDARG00000010680	1	gngt2a	1.69448	0.0271926
ENSDARG00000014854	1	REEP1	1.69532	0.0174049
ENSDARG00000045553	1	HSD17B2	1.69563	0.0184366
ENSDARG00000079271	1	DCXR	1.69625	0.0182195
ENSDARG00000037334	1	WDR92	1.69742	0.0223258
ENSDARG00000019772	1	si:ch1073-280e3.1	1.70005	0.0144275
ENSDARG00000061303	1	OCA2	1.70059	0.0227347
ENSDARG00000005481	1	nfkbiaa	1.70082	0.0156813
ENSDARG00000092042	1	ENSDARG00000092042	1.70282	0.0342444
ENSDARG00000008029	1	mep1a.2	1.70487	0.0198995
ENSDARG00000055300	1	atxn7l2a	1.70777	0.00777639
ENSDARG00000042780	1	apoba	1.7078	0.0236106
ENSDARG00000089705	1	ABCF3	1.70912	0.0208325
ENSDARG00000052897	1	ATXN2	1.71017	0.0189752
ENSDARG00000008540	1	Sox21b	1.71133	0.0222071
ENSDARG00000017115	1	KCTD10	1.7127	0.0163013
ENSDARG00000014910	1	panx1b	1.71351	0.0233755
ENSDARG00000025436	1	msrb1a	1.71454	0.0311387
ENSDARG00000096721	1	si:rp71-1c10.11	1.71518	0.021206
ENSDARG00000010047	1	neu3.2	1.71602	0.0295935
ENSDARG00000098995	1	cyp2k6	1.72048	0.0251602
ENSDARG00000036171	1	rnasel3	1.72101	0.0292572
ENSDARG00000027916	1	FNTB	1.72109	0.00769215
ENSDARG00000055493	1	HIC1	1.72379	0.0145609
ENSDARG00000100731	1	slc27a2b	1.72382	0.00419204
ENSDARG00000044129	1	si:ch211-214p16.1	1.72462	0.0195559
ENSDARG00000061304	1	PPP1R9A	1.72664	0.029583
ENSDARG00000061201	1	ACSF2	1.72953	0.0292578
ENSDARG00000100021	1	HRASLS	1.7297	0.0294713
ENSDARG00000078352	1	LYRM4	1.73127	0.00418746
ENSDARG00000058608	1	WSB2	1.73176	0.0223246
ENSDARG00000003411	1	FOXA2	1.73861	0.0279976
ENSDARG00000056233	1	tmem179ba	1.74505	0.0200691
ENSDARG00000018461	1	zgc:56095	1.74557	0.0126382
ENSDARG00000077201	1	myo7bb	1.7464	0.0211485
ENSDARG00000104654	1	leap2	1.7464	0.0230158
ENSDARG00000100633	1	zgc:114200	1.74665	0.0103286
ENSDARG00000063079	1	ago3b	1.74783	0.0195906
ENSDARG00000070107	1	six7	1.74788	0.0208827
ENSDARG00000051931	1	EDC3	1.74877	0.0212799
ENSDARG00000017569	1	reep3a	1.75362	0.0145128
ENSDARG00000007080	1	rhcgl1	1.7558	0.0142026
ENSDARG00000105073	1	LOC100148620	1.75659	0.0193993
ENSDARG00000091209	1	UCP3	1.75928	0.0213659
ENSDARG00000019752	1	rom1a	1.76103	0.0172305
ENSDARG00000003113	1	ADA	1.76364	0.017917
ENSDARG00000037551	1	pm20d1.1	1.76979	0.017462
ENSDARG00000100531	1	ABHD14B	1.77064	0.0229694
ENSDARG00000078118	1	fam60al	1.77175	0.0160627
ENSDARG00000058462	1	zgc:158846	1.77271	0.0163583
ENSDARG00000054319	1	oxct1b	1.77902	0.0160743
ENSDARG00000036773	1	s100s	1.77963	0.00519779
ENSDARG00000055185	1	TM4SF5	1.78129	0.0210708
ENSDARG00000036376	1	cldn7a	1.78256	0.0188469
ENSDARG00000076333	1	ENSDARG00000076333	1.78481	0.0212704
ENSDARG00000100977	1	golim4a	1.78852	0.0201506
ENSDARG00000061858	1	zgc:153968	1.79049	0.0187023
ENSDARG00000009544	1	cldnb	1.79191	0.0114628
ENSDARG00000076075	1	myh7ba	1.79203	0.0198507
ENSDARG00000077469	1	POLR1B	1.79339	0.0203044
ENSDARG00000069464	1	Cox7a1	1.7982	0.0122199
ENSDARG00000076361	1	LOC100333855	1.8003	0.014514
ENSDARG00000074425	1	si:busm1-57f23.1	1.80058	0.0181377
ENSDARG00000013522	1	PCK1	1.80097	0.00956255
ENSDARG00000104733	1	COQ4	1.80122	0.0185771
ENSDARG00000012600	1	helz2b	1.80349	0.0168027
ENSDARG00000062721	1	DENND4A	1.80601	0.00926043
ENSDARG00000060622	1	si:ch73-14h1.2	1.81088	0.0102504
ENSDARG00000026359	1	pbld2	1.81138	0.0169558
ENSDARG00000057035	1	stoml3b	1.81159	0.0129446
ENSDARG00000026500	1	XKR9	1.81485	0.0146206
ENSDARG00000086455	1	LOC108179032	1.81666	0.00778645
ENSDARG00000010478	1	hsp90aa1.1	1.81939	0.0120323
ENSDARG00000074653	1	si:ch211-233m11.1	1.82157	0.00844157
ENSDARG00000063244	1	LIX1L	1.82175	0.0134105
ENSDARG00000043716	1	cldn5a	1.82227	0.00847834
ENSDARG00000103806	1	ENSDARG00000103806	1.82251	0.00684962
ENSDARG00000051925	1	CYB5R2	1.82274	0.0132903
ENSDARG00000051939	1	pcxB	1.82535	0.0137208
ENSDARG00000097513	1	LOC100006250	1.8254	0.0132078
ENSDARG00000021720	1	COL7A1	1.82612	0.0147752
ENSDARG00000003615	1	slc26a3.2	1.83182	0.0161269
ENSDARG00000054890	1	rgrA	1.83346	0.00581615
ENSDARG00000094077	1	si:dkey-21e2.16	1.83524	0.0146441
ENSDARG00000042953	1	cyp2n13	1.83859	0.0150883
ENSDARG00000016649	1	AKR7A3	1.84011	0.00625173
ENSDARG00000044781	1	bace2	1.84181	0.0136538
ENSDARG00000097539	1	LOC110437733	1.84209	0.00582696
ENSDARG00000069048	1	SERPINF1	1.84451	0.0111378
ENSDARG00000097931	1	si:dkeyp-86b9.5	1.84554	0.0132891
ENSDARG00000006062	1	akap1b	1.84664	0.0133425
ENSDARG00000045887	1	mmp30	1.85704	0.0139211
ENSDARG00000104022	1	gcgra	1.86502	0.00804225
ENSDARG00000039605	1	MAT1A	1.86544	0.00770657
ENSDARG00000092376	1	LOC796210	1.8684	0.00746046
ENSDARG00000102569	1	POLR3A	1.87142	0.00889537
ENSDARG00000092532	1	si:dkey-21e2.4	1.87925	0.0088715
ENSDARG00000039423	1	si:ch211-217g15.3	1.88383	0.0118671
ENSDARG00000096668	1	mzt1	1.89253	0.00180645
ENSDARG00000099118	1	si:dkey-218f9.10	1.89617	0.0107939
ENSDARG00000035544	1	ETNPPL	1.89788	0.00709807
ENSDARG00000007715	1	LGSN	1.91074	0.00719325
ENSDARG00000014303	1	VAC14	1.91412	0.00705097
ENSDARG00000052402	1	dnmt3ba	1.91832	0.00921465
ENSDARG00000057706	1	tm4sf21a	1.92311	0.00596681
ENSDARG00000052734	1	hmgcra	1.93632	0.00475428
ENSDARG00000077249	1	GMIP	1.93886	0.00670677
ENSDARG00000007130	1	MRTO4	1.94736	0.00359704
ENSDARG00000038476	1	si:dkeyp-68b7.7	1.9484	0.00242986
ENSDARG00000030267	1	gtf3aa	1.9666	0.00501796
ENSDARG00000017882	1	Rdh1	1.97214	0.00672409
ENSDARG00000060980	1	ATP8B1	1.98174	0.00486158
ENSDARG00000102482	1	zgc:165573	1.98944	0.000559747
ENSDARG00000056091	1	cttnbp2nlb	1.99465	0.0051561
ENSDARG00000023820	1	FAXDC2	2.00702	0.00266659
ENSDARG00000030758	1	GUCA1C	2.01263	0.00119957
ENSDARG00000099185	1	chia.2	2.01298	0.0036581
ENSDARG00000098162	1	zgc:77748	2.02136	0.00289454
ENSDARG00000055278	1	CFB	2.04113	0.00389708
ENSDARG00000100439	1	zgc:153383	2.04648	0.00260646
ENSDARG00000102415	1	scinla	2.05608	0.00164633
ENSDARG00000100844	1	cldn15lb	2.06889	0.00357613
ENSDARG00000090707	1	ENSDARG00000090707	2.08491	0.00153151
ENSDARG00000009733	1	KIF21B	2.11868	0.00144452
ENSDARG00000016138	1	NME6	2.13776	0.0023362
ENSDARG00000032326	1	MECR	2.13826	0.00160659
ENSDARG00000052207	1	c3a.3	2.16435	0.00212499
ENSDARG00000003902	1	ctsl.1	2.18526	0.000776394
ENSDARG00000004363	1	LHFP	2.19794	0.000304114
ENSDARG00000067828	1	olfcg6	2.21269	0.000657884
ENSDARG00000020994	1	ENSDARG00000020994	2.25711	0.000909372
ENSDARG00000096978	1	ENSDARG00000096978	2.26118	0.000939524
ENSDARG00000094605	1	rgs3a	2.34292	0.000348265
ENSDARG00000042920	1	sult3st3	2.36012	0.000473593
ENSDARG00000023861	1	dnase1l3l	2.42158	0.000244201
ENSDARG00000073801	1	si:dkeyp-104h9.5	2.46506	0.000310766
ENSDARG00000005704	1	eps8l3b	2.49397	0.000198592
ENSDARG00000097804	1	lypc	2.56646	4.48493e-05
ENSDARG00000086927	1	PIK3C2B	2.79985	2.8602e-05
ENSDARG00000045411	1	ACAD11	3.19608	3.90874e-06

## Sheet: 0.1 ppm
ENSEMBL ID	Conc. (ppm)	Gene Symbol	Fold change	pvalue
ENSDARG00000018750	0.1	npr1b	2.1633	0.000368591
ENSDARG00000078503	0.1	dennd1c	2.02415	0.000370794
ENSDARG00000033161	0.1	sst1.2	2.01695	0.000899891
ENSDARG00000086455	0.1	LOC108179032	1.98198	0.000645656
ENSDARG00000032326	0.1	mecr	1.96924	0.00135906
ENSDARG00000015290	0.1	sacm1la	1.95517	0.00217607
ENSDARG00000074653	0.1	si:ch211-233m11.1	1.94126	0.000995912
ENSDARG00000099185	0.1	chia.2	1.90153	0.00261005
ENSDARG00000101293	0.1	pkn2b	1.88771	0.00328498
ENSDARG00000051931	0.1	edc3	1.88567	0.00205258
ENSDARG00000071905	0.1	-	1.8534	0.0026105
ENSDARG00000086927	0.1	pik3c2b	1.85138	0.00162431
ENSDARG00000023272	0.1	tfap2d	1.84525	0.00526916
ENSDARG00000031119	0.1	baiap2l1b	1.84404	0.00466131
ENSDARG00000004363	0.1	lhfpl6	1.83857	0.0048596
ENSDARG00000014854	0.1	reep1	1.82173	0.00574749
ENSDARG00000077201	0.1	myo7bb	1.80521	0.00645802
ENSDARG00000074818	0.1	si:cabz01036022.1	1.80256	0.00220833
ENSDARG00000079624	0.1	amer1	1.80139	0.00648045
ENSDARG00000055899	0.1	lzic	1.78734	0.0042664
ENSDARG00000068732	0.1	spry4	1.78084	0.00132645
ENSDARG00000006062	0.1	akap1b	1.77288	0.00880614
ENSDARG00000091916	0.1	ugt5b4	1.75337	0.00920381
ENSDARG00000056550	0.1	tango2	1.74448	0.0106133
ENSDARG00000076041	0.1	wwc1	1.74343	0.0110012
ENSDARG00000042182	0.1	drc1	1.73989	0.00945563
ENSDARG00000008029	0.1	mep1a.2	1.72569	0.00659353
ENSDARG00000101079	0.1	hectd4	1.72153	0.0132804
ENSDARG00000056467	0.1	tmub2	1.7145	0.010296
ENSDARG00000007823	0.1	atf3	1.71431	0.00646083
ENSDARG00000052654	0.1	thrab	1.70939	0.012678
ENSDARG00000057184	0.1	zgc:55781	1.70712	0.0145865
ENSDARG00000078864	0.1	lats2	1.69322	0.0158253
ENSDARG00000087599	0.1	si:dkey-237h12.3	1.68919	0.0169224
ENSDARG00000034457	0.1	si:ch211-163l21.7	1.68788	0.0169224
ENSDARG00000058728	0.1	nudt2	1.68601	0.0163068
ENSDARG00000026406	0.1	anxa5a	1.68549	0.0146415
ENSDARG00000036057	0.1	tradd	0.591601	0.013743
ENSDARG00000045836	0.1	mapk11	0.584686	0.0133207
ENSDARG00000052894	0.1	znf532	0.583198	0.013512
ENSDARG00000099482	0.1	LOC101883107	0.580209	0.0131093
ENSDARG00000104495	0.1	pltp	0.576429	0.00303506
ENSDARG00000041926	0.1	dlg4	0.569381	0.00926929
ENSDARG00000098702	0.1	zgc:165603	0.564213	0.00593987
ENSDARG00000078947	0.1	sdccag8	0.548465	0.00581149
ENSDARG00000017790	0.1	chrnb2	0.535086	0.00182875
ENSDARG00000088204	0.1	shisa8b	0.526511	0.00121721
ENSDARG00000068192	0.1	taf4a	0.518236	0.00230056
ENSDARG00000096645	0.1	si:ch211-131k2.2	0.495099	0.00124959
